# Supplementary material for: Initial atmospheric conditions control transport of volcanic volatiles, forcing and impacts
Source: Copernicus journal article supplement (doi:10.5194/acp-24-6233-2024), 2024-05-28
Supplement: Supplementary file 1 [file acp-24-6233-2024-supplement.pdf]

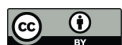

*Supplement of*

## **Initial atmospheric conditions control transport of volcanic volatiles, forcing and impacts**

**Zhihong Zhuo et al.**

*Correspondence to:* Zhihong Zhuo (zhihong.zhuo@geo.uio.no)

The copyright of individual parts of the supplement might differ from the article licence.

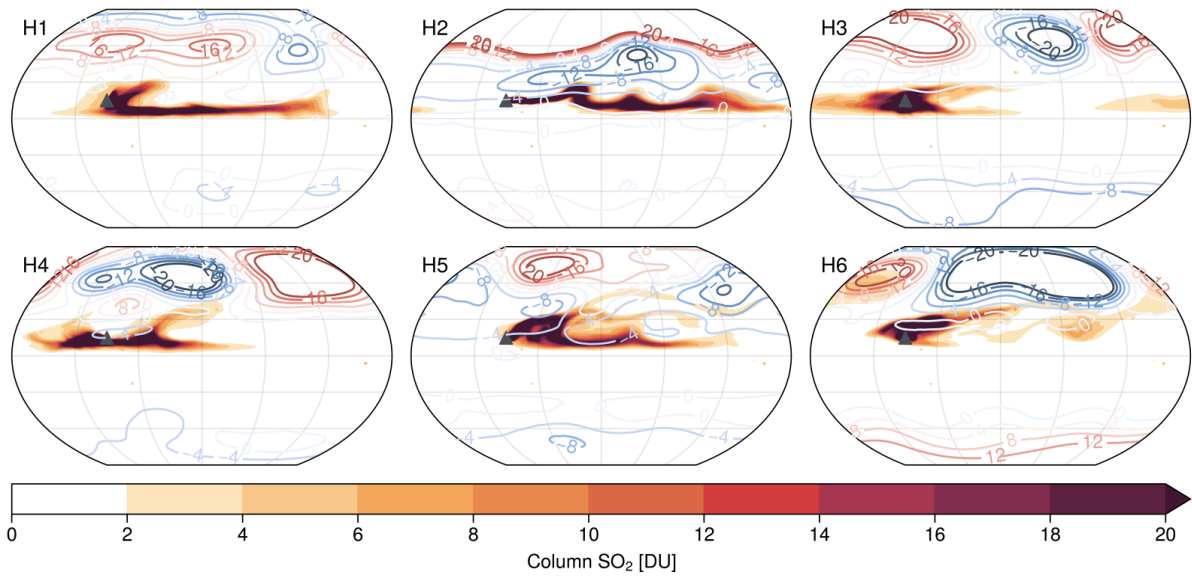

Figure S1. The first month longitudinal and latitudinal distribution of  $\text{SO}_2$  column burden (filled contours) and geopotential height anomaly in units of geopotential decameters (contours) at 30 hPa after tropical eruptions in January for the six members of the baseline experiment. The gray triangle denotes the eruption latitude and longitude at  $15^\circ \text{ N}$  and  $91^\circ \text{ W}$ .

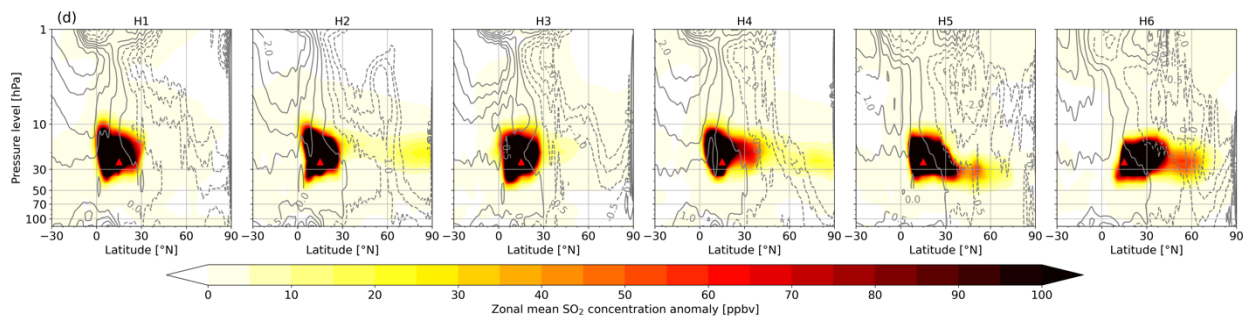

Figure S2. First month latitudinal and vertical distribution of  $\text{SO}_2$  concentration anomaly (shades), and residual vertical velocity ( $w^*$ , contours with an interval of  $0.5 \text{ mm s}^{-1}$ ) (d) in the stratosphere after tropical eruptions in January for six members of the baseline experiments. The red triangle indicates the eruption latitude at  $15^\circ \text{ N}$  and the injection altitude at 24 km.

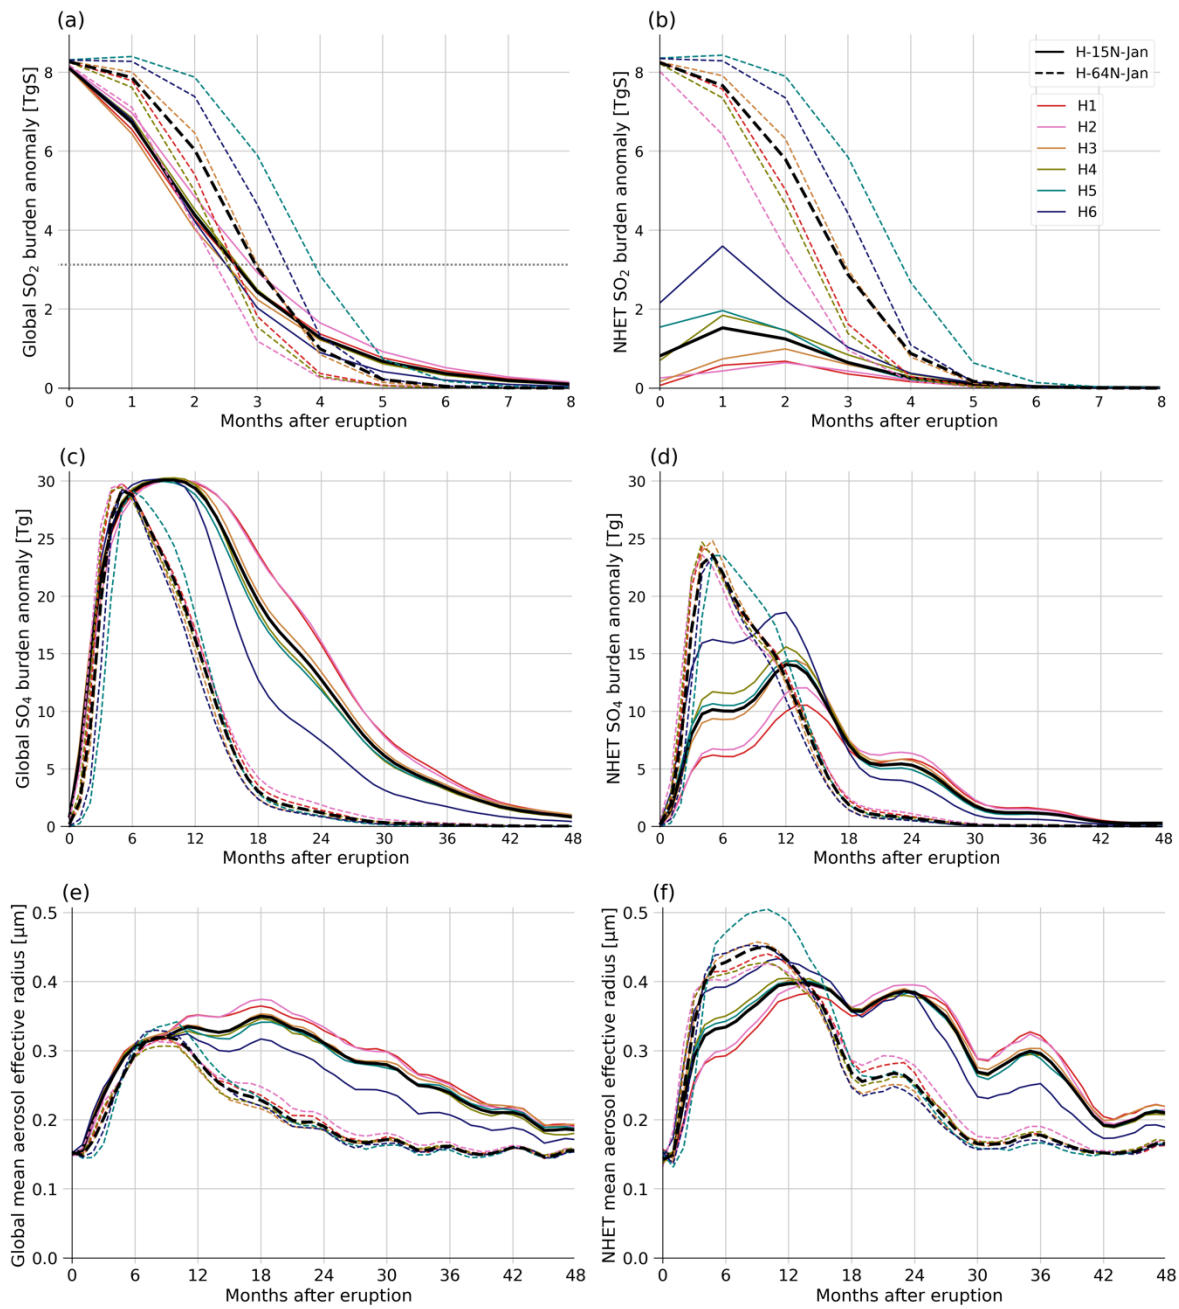

Figure S3. Global (left panel) and Northern Hemisphere extratropics (NHET [30 °N – 90 °N], right panel) SO<sub>2</sub> (a, b), SO<sub>4</sub> (c, d) burden anomaly and aerosol effective radius ( $R_{\text{eff}}$ , e, f). Solid lines and dashed lines are for tropical and NH extratropical eruptions, respectively. Different colors represent different ensemble member realizations. The black lines represent the ensemble means of the baseline experiments. The gray dotted horizontal line in (a) represents the e-folding of injected sulfur. Note the different axes in different subfigures.

## Section 1:

Figure S3 shows time series of global and NHET  $\text{SO}_2$ ,  $\text{SO}_4$ , aerosol effective radius ( $R_{\text{eff}}$ ). The global  $\text{SO}_2$  burden reduces faster in the first months after tropical eruptions (H-15N-Jan, solid lines) compared to NH extratropical eruptions (H-64N-Jan, dashed lines) with an average e-folding time of 2.6 months and 3 months, respectively (Fig. S2a). Along with the reduction of  $\text{SO}_2$ ,  $\text{SO}_4$  forms within the first post-eruption month. The maximum global  $\text{SO}_4$  burden after tropical and NH extratropical eruptions is almost the same, reaching up to 30 Tg, 9 months after the tropical eruptions but 5 months after the NH extratropical eruptions (Fig. S3c). Differences in the transport of  $\text{SO}_2$  lead to different peak timing of  $\text{SO}_4$  after tropical and NH extratropical eruptions. As is reflected by the NHET  $\text{SO}_2$  burden (Fig. S3b), after tropical eruptions (solid lines),  $\text{SO}_2$  increases in the first 1 to 2 months and then decreases and disappears 4 to 5 months after the eruption, while showing a gradual transport of  $\text{SO}_2$  from the tropics to NH high latitudes. Meanwhile, the NHET  $\text{SO}_4$  burden exhibits a sharp increase in the first 4 to 5 months, followed by a decelerated increase, ultimately peaking around 12 months after the tropical eruptions (Fig. S3d). After the NH extratropical eruptions (dashed lines), due to confinement of the aerosols in the NHET region, global and NHET  $\text{SO}_2$  and  $\text{SO}_4$  burden show similar evolution (Fig. S3a–S3d). The duration of global  $\text{SO}_4$  burden is affected by the transport of  $\text{SO}_2$  from tropical to NH extratropical regions, which is longer for tropical eruptions over 48 months in contrast to NH extratropical eruptions over 30 months.

As shown in Figure 1, the initial atmospheric conditions control the transport of volcanic volatiles. The poleward transport of  $\text{SO}_2$  and evolution of  $\text{SO}_4$  in the NHET (Fig. S3b and S3d) show a large spread among the six ensemble members of tropical eruptions. More  $\text{SO}_2$  is transported to NHET in H6 than in H1, leading to a higher peak NHET  $\text{SO}_4$  burden in H6 than in H1. Meanwhile, the global  $\text{SO}_4$  burden shows a faster reduction from its maximum in H6 than in H1 (Fig. S3c). In general, increased NHET transport after tropical eruptions is accompanied by a faster reduction of global  $\text{SO}_4$  burden (Fig. S3c).

The aerosol grows through condensation and coagulation along the conversion of  $\text{SO}_2$  to  $\text{SO}_4$  in the stratosphere. In line with the conversion of  $\text{SO}_2$  to  $\text{SO}_4$ , the global-mean  $\text{SO}_4$  – mass-weighted mean effective radius ( $R_{\text{eff}}$ , Fig. S3e) increases faster after tropical eruptions compared to NH extratropical eruptions for the first 6 months.  $R_{\text{eff}}$  further increases 7–9 months after tropical eruptions when the peak has already been reached after NH extratropical eruptions, and it decreases slower after tropical eruptions compared to NH extratropical eruptions. This is similar for the NHET-mean  $R_{\text{eff}}$  (Fig. S3f) with a smaller but later peak after tropical eruptions compared to NH extratropical eruptions. This agrees with the varied lifetime of  $\text{SO}_2$  and  $\text{SO}_4$  burden (Fig. S3a–S3d). For tropical eruptions, it takes time for  $\text{SO}_2$  to be transported northward, and the amount of  $\text{SO}_2$  transported to the NHET region varies due to different initial atmospheric conditions (Fig. S3b). This is also reflected by different  $R_{\text{eff}}$  in different ensemble members. After tropical eruptions, the NHET-mean  $R_{\text{eff}}$  is larger in maximum, i.e., 0.43  $\mu\text{m}$  in H6 compared to 0.38 and 0.39  $\mu\text{m}$  in H1 and H2, this difference range of 0.05 is approximately 15 times of the  $2\sigma$ -variability of the control run without volcanic injections. The NHET-mean  $R_{\text{eff}}$  decreases faster in H6 than in H1 and H2 (Fig. S3f), indicating a faster removal of larger aerosols with larger gravitational settling velocity than for small aerosols. In line with this, less  $\text{SO}_4$  is available outside of NHET regions. Thus, the maximum global-mean  $R_{\text{eff}}$  is 0.31  $\mu\text{m}$  in H6, smaller than 0.36  $\mu\text{m}$  in H1 and 0.37  $\mu\text{m}$  in H2 (Fig. S3e). For NH extratropical eruptions, the aerosol size grows continuously with  $\text{SO}_2$  concentrated in the NHET region.

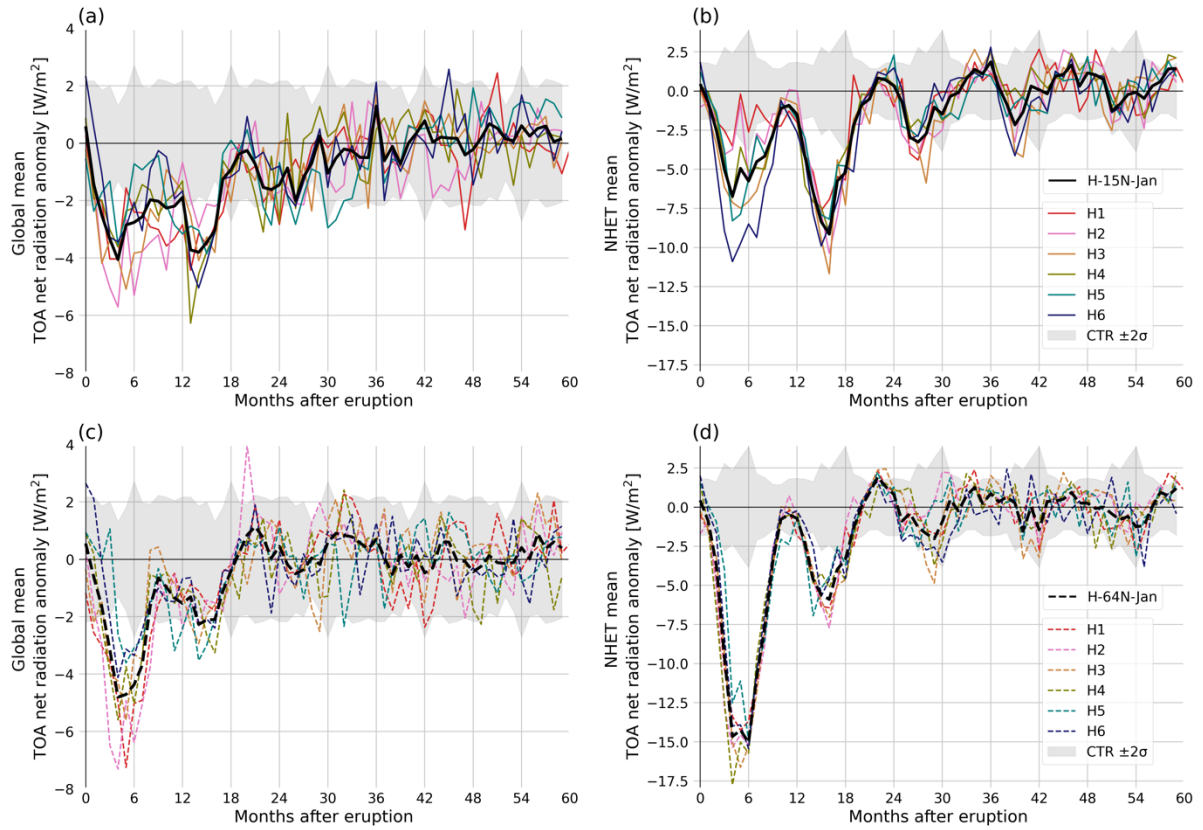

Figure S4. Global (left panel) and Northern Hemisphere extratropical (NHET, right panel) mean net radiation at the top of the atmosphere in full-sky conditions. Solid lines and dashed lines are for tropical (a-b) and NH extratropical (c-d) eruptions, respectively. Different colors represent different ensemble member realizations. The black lines represent the ensemble member means of the baseline experiments. The gray shades represent two standard deviations of the control run. Note the different y-axes between the left and right panels.

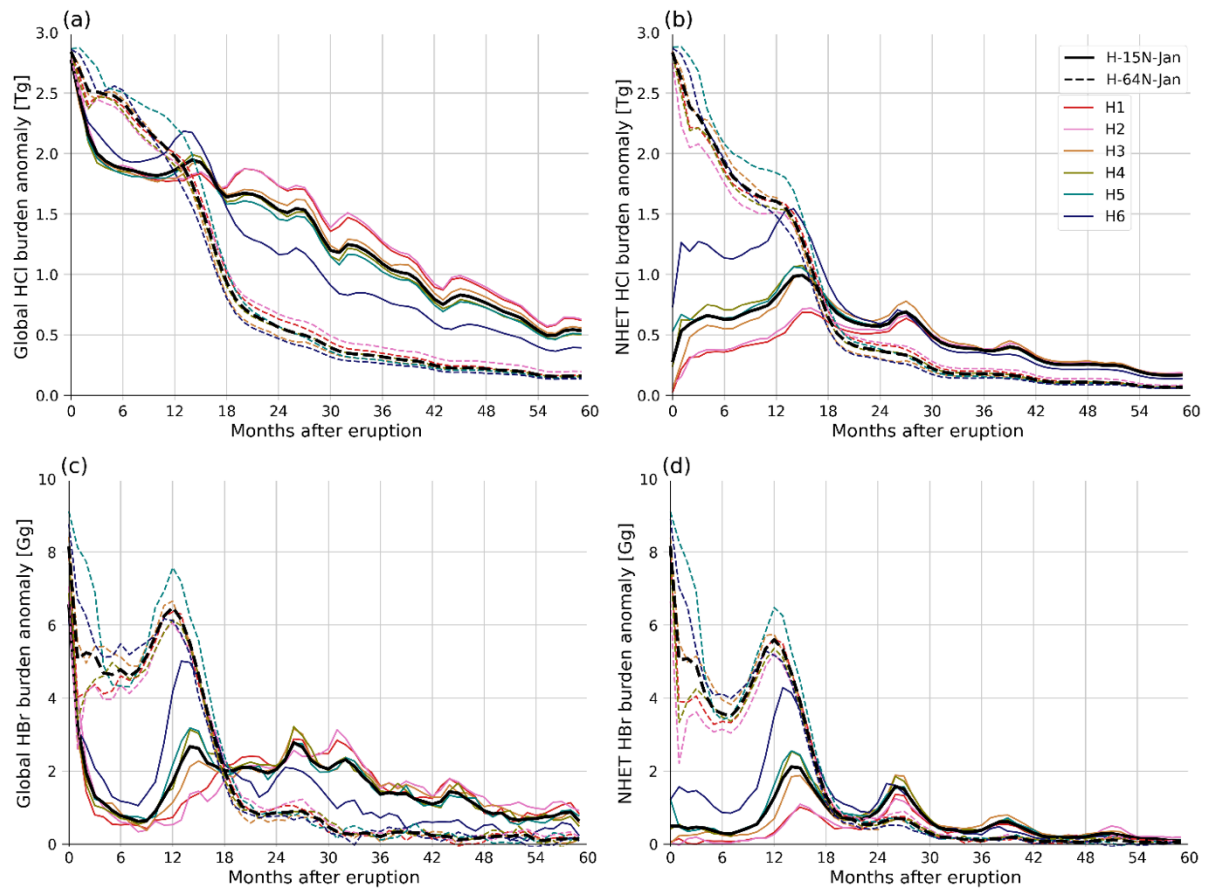

Figure S5. Global (left panel) and Northern Hemisphere extratropics (NHET [30 °N – 90 °N], right panel) HCl (a, b) and HBr (c, d) burden anomaly. Solid lines are variations after tropical eruptions, while dashed lines are variations after NH extratropical eruptions. Different colors represent different ensemble member realizations. The black lines represent the ensemble means of the baseline experiments.

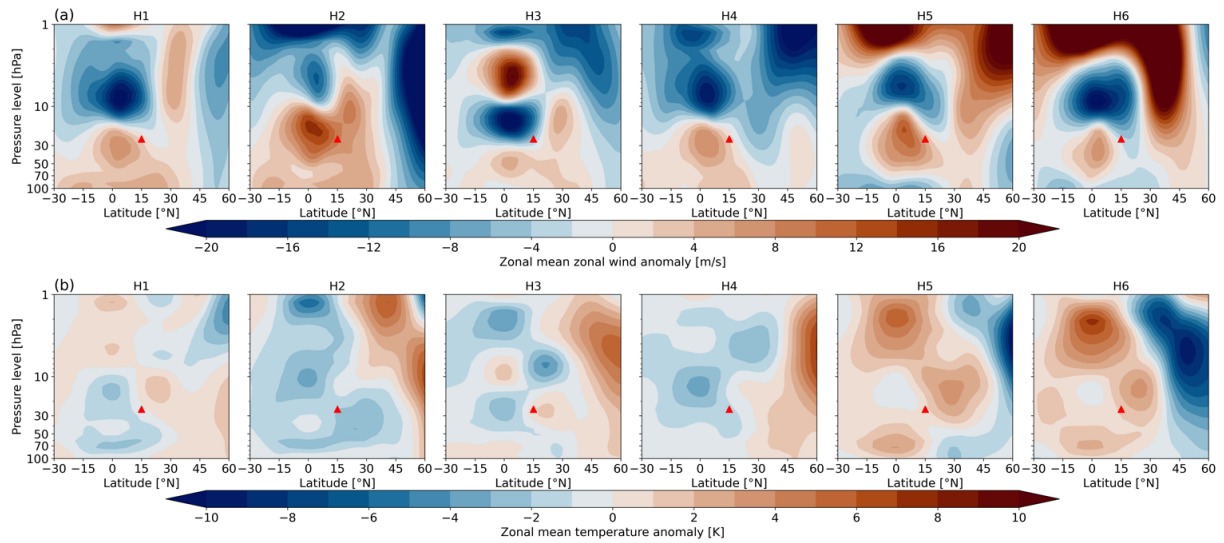

Figure S6. The first month latitudinal and vertical distribution of zonal mean zonal wind (a) and temperature (b) anomaly in six members of the baseline experiments. The red triangle indicates the level and latitude of the tropical volcanic injections.

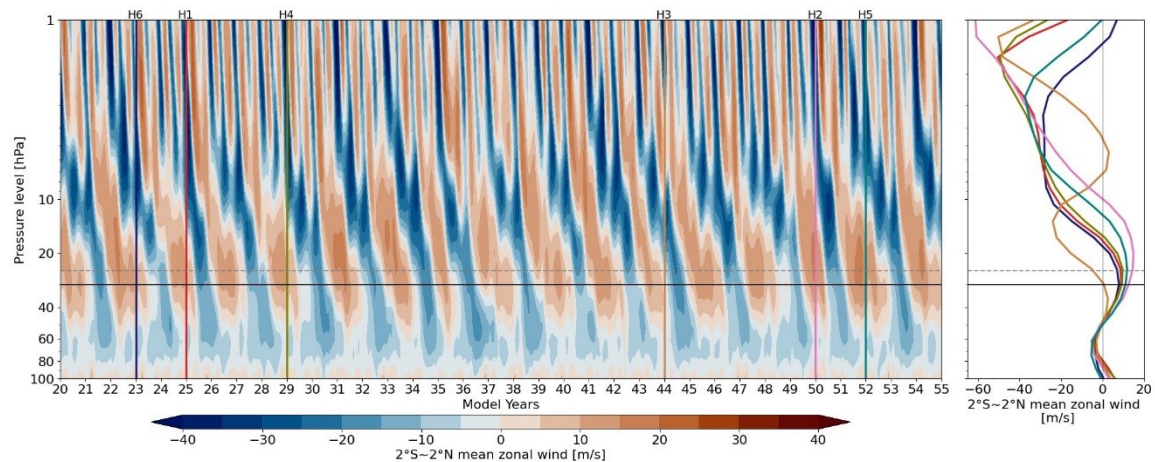

Figure S7. Initial Quasi-Biennial Oscillation (QBO) state indicated by the equatorial ( $2^{\circ}$  S to  $2^{\circ}$  N) mean zonal wind at 30 hPa (black horizontal line). The grey horizontal line indicates the volcanic volatile injection altitude at 25 hPa. Vertical lines denote the selected initial QBO state in January for six members of the baseline experiment, whose wind profiles are displayed in the right panel, with colors corresponding to those shown in Figures 1 to 4.

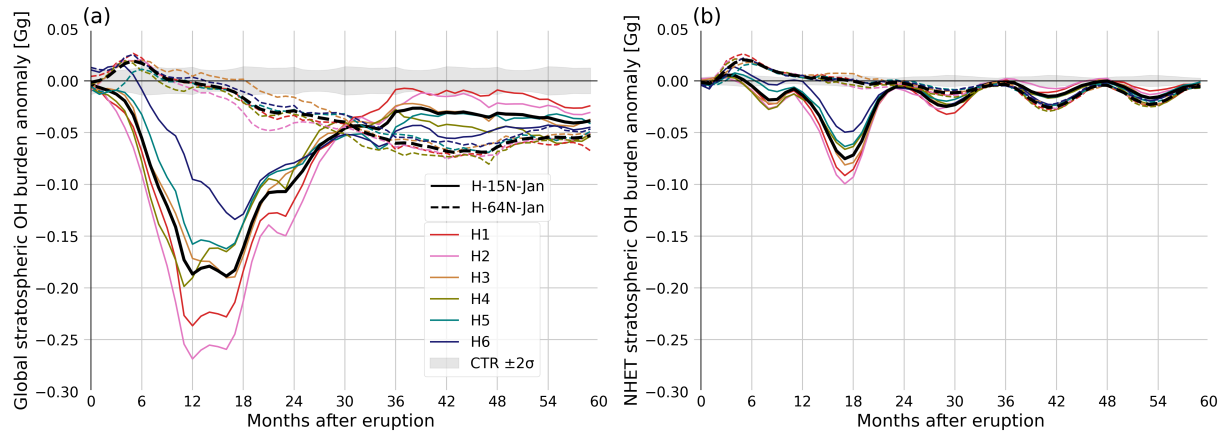

Figure S8. Global (a) and Northern Hemisphere extratropical (NHET, b) stratospheric OH burden anomaly. Solid lines and dashed lines are for tropical and extratropical eruptions, respectively. Different colors represent different ensemble member realizations. The black lines represent the ensemble member means of the baseline experiments.
